# Supplementary material for: Calicivirus VP2 forms a portal-like assembly following receptor engagement
Source: Springer Nature journal article supplement (doi:10.1038/s41586-018-0852-1), 2019-01-01
Supplement: 41586_2018_852_MOESM1_ESM.pdf [file 41586_2018_852_MOESM1_ESM.pdf]

In the format provided by the authors and unedited.

# Calicivirus VP2 forms a portal-like assembly following receptor engagement

Michaela J. Conley<sup>1</sup>, Marion McElwee<sup>1</sup>, Liyana Azmi<sup>2</sup>, Mads Gabrielsen<sup>3</sup>, Olwyn Byron<sup>4</sup>, Ian G. Goodfellow<sup>5</sup> & David Bhella<sup>1\*</sup>

---

<sup>1</sup>Medical Research Council University of Glasgow Centre for Virus Research, Glasgow, UK. <sup>2</sup>Institute of Infection, Immunity and Inflammation, University of Glasgow, Glasgow, UK. <sup>3</sup>CRUK Beatson Institute, Glasgow, UK. <sup>4</sup>School of Life Sciences, University of Glasgow, Glasgow, UK. <sup>5</sup>Division of Virology, Department of Pathology, University of Cambridge, Cambridge, UK.  
\*e-mail: david.bhella@glasgow.ac.uk

# **Calicivirus VP2 forms a portal-like assembly following receptor engagement.**

Michaela J. Conley, Marion McElwee, Liyana Azmi, Mads Gabrielsen, Olwyn Byron, Ian G. Goodfellow and David Bhella

Supplemental Data

## Supplemental Data 1

### VP1 protein sequence:

```
1 MCSTCANVLK YYNWDPHFRL VIDPNKFLSV GFCDNPLMCC YPELLPEFGT VWDCDQSPLQ
61 IYLESILGDD EWASTYEAI D PAVPPMHWDA AGKIFQPHPG VLMHHLIGEV AKAWDPNLPM
121 FRLEADGDGS ITAPEQGTPV GGVI AEP SAQ MSAAADMATG KSV DSEWEAF FSFHTSVNWS
181 TSETQ GKILF KQSLG PLLNP YLEHLAKLYV AWSGSIDVRF SISGSGVFGG KLAAIVVPPG
241 VDPVQST SML QYPHVLF DAR QVEPVIF SIP DLRSTLYHLM SDTDTTSLVI MVYNDLINPY
301 ANDSNSSGCI VTVETKPGAD FKFHLLKPPG SMLTHGSVPS DLIPKSSSLW IGNRHWT DIT
361 DFVIRPFV FQ ANRHFDNFQE TAGWSTPRYR PITITISEKN GAKLGIGVAT DYIVPGIPDG
421 WPDTTIPEKL TPAGDYAITN KSGNDITTA GYDGADVIVN NTNFKGMYIC GSLQRAWGDK
481 KISNTAFITT ATKVDNAIEP SNVIDMTKIA VYQDTHVGKE VQTSDDTL SL LGYTGIGEQA
541 IGS DRDRVVR ISVLPETGAR GGNHP IFYKN SIKLGYVIRS IDVFNSQILH TSRQLSLNHY
601 LLPPDSFAVY RIIDSNGSWF DIGIDSDGFS FVGVSSIGKL EFPLTASYMG IQLAKIRLAS
661 NIRSSMTKL
```

### VP2 protein sequence

```
1 MNSILGLIDT VTNTIGKAQQ IELDKAALGQ QRELALKRMK LDHQALNNQV EQFNKILEQR
61 VQGPIQSVRL ARAAGFRVDP YSYTDQNFYD DQLNAIRLSY RNLFKN
```

### SD 1

Protein sequences for FCV strain F9 major capsid protein VP1 and minor capsid protein VP2.

## Supplemental Data 2

Table S2a

| VP1 Chain A      | % accessible area buried |  | fJAM-A <sup>A</sup> | % accessible area buried |
|------------------|--------------------------|--|---------------------|--------------------------|
| LYS 399          | 10                       |  | TYR 31              | 30                       |
| ASN 400          | 50                       |  | SER 33              | 40                       |
| GLY 401          | 70                       |  | GLU 34              | 10                       |
| ALA 402          | 50                       |  | ARG 38              | 10                       |
| LYS 403          | 20                       |  | VAL 39              | 40                       |
| LYS 429          | 10                       |  | PRO 40              | 70                       |
| THR 431          | 90                       |  | ASP 42              | 10                       |
| PRO 432          | 70                       |  | LYS 43              | 70                       |
| ALA 433          | 80                       |  | PRO 44              | 90                       |
| GLY 434          | 50                       |  | ALA 45              | 80                       |
| ASP 435          | 50                       |  | LYS 46              | 90                       |
| TYR 436          | 10                       |  | SER 48              | 20                       |
| ALA 437          | 80                       |  | SER 50              | 70                       |
| ILE 438          | 20                       |  | TYR 51 (ASN 444)    | 100                      |
| THR 439          | 100                      |  | SER 52              | 50                       |
| LYS 441          | 10                       |  | GLY 53              | 20                       |
| SER 442          | 30                       |  | PHE 54              | 60                       |
| GLY 443          | 80                       |  | SER 55              | 20                       |
| ASN 444 (TYR 51) | 60                       |  | ASN 56              | 10                       |
| ASP 445          | 70                       |  | PRO 57              | 60                       |
| ILE 446          | 80                       |  | THR 87              | 20                       |
| THR 448          | 20                       |  | SER 89              | 60                       |
| ASN 461          | 60                       |  | HIS 90              | 60                       |
| THR 462          | 40                       |  | SER 91              | 100                      |
| ASN 463          | 90                       |  | THR 94              | 80                       |
| ASP 495          | 30                       |  | PHE 95              | 70                       |
| ASN 496 (HIS 96) | 90                       |  | HIS 96 (ASN 496)    | 60                       |
| ALA 497          | 100                      |  | SER 97              | 10                       |
| VAL 517          | 10                       |  | PRO 130             | 50                       |
| GLY 518          | 60                       |  | PRO 131             | 10                       |
| LYS 519          | 60                       |  | TYR 217             | 60                       |
| GLU 520          | 20                       |  | GLY 218             | 50                       |
|                  |                          |  | MET 219             | 20                       |
|                  |                          |  | MET 221             | 20                       |

**Table S2b**

| VP1 Chain A | % accessible area buried |  | fJAM-A <sup>B</sup> | % accessible area buried |
|-------------|--------------------------|--|---------------------|--------------------------|
| GLY 478     | 20                       |  | TYR 31              | 20                       |
| LYS 480     | 40                       |  | SER 33              | 70                       |
| LYS 481     | 30                       |  | GLU 34              | 10                       |
|             |                          |  | SER 50              | 40                       |

**Table S2c**

| VP1 Chain B      | % accessible area buried |  | fJAM-A <sup>A</sup> | % accessible area buried |
|------------------|--------------------------|--|---------------------|--------------------------|
| LYS 480 (SER 33) | 50                       |  | TYR 31              | 20                       |
| LYS 481          | 30                       |  | THR 32              | 10                       |
|                  |                          |  | SER 33 (LYS 480)    | 70                       |
|                  |                          |  | GLU 34              | 10                       |
|                  |                          |  | SER 50              | 40                       |

**Table S2d**

| VP1 Chain B      | % accessible area buried | fJAM-A <sup>B</sup> | % accessible area buried |
|------------------|--------------------------|---------------------|--------------------------|
| LYS 399          | 10                       | TYR 31              | 10                       |
| ASN 400          | 50                       | SER 33              | 20                       |
| GLY 401          | 70                       | GLU 34              | 20                       |
| ALA 402          | 70                       | PRO 40              | 80                       |
| LYS 429          | 10                       | GLU 41              | 10                       |
| THR 431          | 90                       | ASP 42              | 10                       |
| PRO 432          | 60                       | LYS 43              | 70                       |
| ALA 433          | 70                       | PRO 44              | 80                       |
| GLY 434          | 50                       | ALA 45              | 70                       |
| ASP 435          | 50                       | LYS 46 (ASN 463)    | 80                       |
| TYR 436          | 10                       | SER 48              | 10                       |
| ALA 437          | 50                       | SER 50              | 60                       |
| THR 439          | 100                      | TYR 51 (ASP 445)    | 100                      |
| LYS 441          | 10                       | SER 52              | 40                       |
| SER 442          | 60                       | GLY 53              | 20                       |
| GLY 443          | 90                       | PHE 54 (ASN 444)    | 90                       |
| ASN 444 (PHE 54) | 70                       | SER 55              | 10                       |
| ASP 445 (TYR 51) | 70                       | PRO 57              | 50                       |
| VAL 459          | 10                       | THR 87              | 30                       |
| ASN 461          | 80                       | SER 89              | 50                       |
| THR 462          | 10                       | HIS 90              | 60                       |
| ASN 463 (LYS 46) | 70                       | SER 91              | 90                       |
| VAL 494          | 20                       | THR 94              | 90                       |
| ASP 495          | 10                       | PHE 95              | 50                       |
| ASN 496 (HIS 96) | 80                       | HIS 96 (ASN 496)    | 70                       |
| ALA 497          | 100                      | SER 97              | 20                       |
| GLY 518          | 60                       | PRO 130             | 50                       |
| LYS 519          | 70                       | TYR 217             | 80                       |
| GLU 520          | 30                       | GLY 218             | 50                       |
|                  |                          | MET 219             | 40                       |
|                  |                          | MET 221             | 10                       |

**Table S2e**

| VP1 Chain C              | % accessible area buried |  | fJAM-A <sup>C</sup> | % accessible area buried |
|--------------------------|--------------------------|--|---------------------|--------------------------|
| ASN 400                  | 40                       |  | TYR 31              | 10                       |
| GLY 401                  | 70                       |  | SER 33              | 30                       |
| ALA 402                  | 50                       |  | GLU 34              | 20                       |
| LEU 404                  | 30                       |  | PRO 40              | 90                       |
| LYS 429                  | 20                       |  | GLU 41              | 10                       |
| THR 431                  | 90                       |  | ASP 42 (ASN 496)    | 30                       |
| PRO 432                  | 60                       |  | LYS 43              | 70                       |
| ALA 433                  | 80                       |  | PRO 44              | 90                       |
| GLY 434                  | 40                       |  | ALA 45              | 60                       |
| ASP 435                  | 40                       |  | LYS 46 (ASN 463)    | 90                       |
| TYR 436                  | 10                       |  | SER 50              | 60                       |
| ALA 437                  | 80                       |  | TYR 51 (ASP 445)    | 100                      |
| ILE 438                  | 60                       |  | SER 52              | 40                       |
| THR 439                  | 100                      |  | GLY 53 (ASN 444)    | 20                       |
| LYS 441                  | 10                       |  | PHE 54 (ASN 444)    | 60                       |
| SER 442                  | 60                       |  | SER 55              | 10                       |
| GLY 443                  | 90                       |  | PRO 57              | 80                       |
| ASN 444 (GLY 53, PHE 54) | 70                       |  | ASN 76              | 10                       |
| ASP 445 (TYR 51)         | 80                       |  | THR 87              | 20                       |
| THR 447                  | 10                       |  | SER 89              | 60                       |
| VAL 459                  | 10                       |  | HIS 90              | 70                       |
| ASN 461                  | 80                       |  | SER 91              | 100                      |
| ASN 463 (LYS 46)         | 70                       |  | THR 94              | 100                      |
| VAL 494                  | 20                       |  | PHE 95              | 80                       |
| ASP 495                  | 10                       |  | HIS 96              | 70                       |
| ASN 496 (ASP 42)         | 100                      |  | SER 97              | 20                       |
| ALA 497                  | 100                      |  | LEU 128             | 10                       |
| VAL 517                  | 20                       |  | VAL 129             | 10                       |
| GLY 518                  | 70                       |  | PRO 130             | 40                       |
| LYS 519                  | 60                       |  | TYR 217             | 70                       |
| GLU 520                  | 50                       |  | GLY 218             | 80                       |
|                          |                          |  | MET 219             | 20                       |

**Table S2f**

| VP1 Chain C              | % accessible area buried |  | fJAM-A <sup>D</sup> | % accessible area buried |
|--------------------------|--------------------------|--|---------------------|--------------------------|
| GLY 478                  | 10                       |  | TYR 31              | 20                       |
| LYS 480                  | 40                       |  | SER 33 (LYS 481)    | 60                       |
| LYS 481 (SER 33, GLU 34) | 40                       |  | GLU 34 (LYS 481)    | 20                       |
|                          |                          |  | SER 48              | 10                       |
|                          |                          |  | SER 50              | 30                       |

**Table S2g**

| VP1 Chain D | % accessible area buried |  | fJAM-A <sup>C</sup> | % accessible area buried |
|-------------|--------------------------|--|---------------------|--------------------------|
| GLY 478     | 10                       |  | TYR 31              | 20                       |
| LYS 480     | 40                       |  | SER 33              | 70                       |
| LYS 481     | 40                       |  | GLU 34              | 30                       |
|             |                          |  | SER 50              | 20                       |

**Table S2h**

| VP1 Chain D             | % accessible area buried |  | fJAM-A <sup>D</sup>     | % accessible area buried |
|-------------------------|--------------------------|--|-------------------------|--------------------------|
| ASN 400                 | 60                       |  | TYR 31                  | 10                       |
| GLY 401                 | 70                       |  | SER 33                  | 30                       |
| ALA 402                 | 40                       |  | GLU 34                  | 20                       |
| LEU 404                 | 10                       |  | PRO 40                  | 80                       |
| LYS 429                 | 10                       |  | GLU 41                  | 10                       |
| THR 431                 | 90                       |  | ASP 42                  | 20                       |
| PRO 432                 | 60                       |  | LYS 43                  | 70                       |
| ALA 433                 | 70                       |  | PRO 44                  | 80                       |
| GLY 434                 | 50                       |  | ALA 45                  | 70                       |
| ASP 435                 | 50                       |  | LYS 46                  | 90                       |
| TYR 436                 | 10                       |  | SER 48                  | 20                       |
| ALA 437                 | 70                       |  | SER 50                  | 70                       |
| ILE 438                 | 10                       |  | TYR 51                  | 90                       |
| THR 439                 | 100                      |  | SER 52                  | 30                       |
| LYS 441                 | 10                       |  | GLY 53                  | 20                       |
| SER 442                 | 20                       |  | PHE 54                  | 50                       |
| GLY 443                 | 90                       |  | SER 55                  | 10                       |
| ASN 444                 | 70                       |  | PRO 57                  | 50                       |
| ASP 445                 | 90                       |  | THR 87                  | 20                       |
| THR 447                 | 10                       |  | SER 89                  |                          |
| VAL 459                 | 10                       |  | HIS 90                  | 50                       |
| ASN 461                 | 80                       |  | SER 91                  | 80                       |
| THR 462                 | 10                       |  | THR 94                  | 100                      |
| ASN 463                 | 70                       |  | PHE 95                  | 100                      |
| VAL 494                 | 10                       |  | <b>HIS 96 (ASN 496)</b> | <b>80</b>                |
| ASP 495                 | 10                       |  | SER 97                  | 60                       |
| <b>ASN 496 (HIS 96)</b> | <b>100</b>               |  | PRO 130                 | 10                       |
| ALA 497                 | 100                      |  | TYR 217                 | 60                       |
| VAL 517                 | 10                       |  | GLY 218                 | 60                       |
| GLY 518                 | 60                       |  | MET 219                 | 50                       |
| LYS 519                 | 40                       |  |                         | 20                       |
| GLU 520                 | 10                       |  |                         |                          |



## SD 2

Tables to show the amino-acid residues that contribute to the interfaces between FCV VP1 and the fJAM-A. The tables list amino acids contributing to contact interfaces in each column, rows do not indicate direct interactions between specific amino-acid residues. Interfaces are described for VP1 chain A bound to fJAM-A<sup>A</sup>, the molecule primarily bound to chain A (3a), and to fJAM-A<sup>B</sup>, the molecule primarily bound to VP1 chain B (3b). Similarly, we show interface data for VP1 chain B contacts with fJAM-A<sup>A</sup> and fJAM-A<sup>B</sup> (3c and 3d respectively), VP1 chain C contacting fJAM-A<sup>C</sup> and fJAM-A<sup>D</sup> (3e and 3f respectively) and VP1 chain D interfaces with fJAM-A<sup>C</sup> and fJAM-A<sup>D</sup> (3g and 3h respectively). Residues coloured blue are predicted to form a hydrogen bond with the residue in brackets, residues coloured red are predicted to form a salt-bridge.



Norwalk D-SFVVAGRVMTCPSPDFNFLFLVPPTVEQKTRPFTLPNLPSSLS---NSRAPLPSS 252  
 MNV E-SFVVSGRLLSKPAADFNFVYLTPIPIERTIYRMVDLPVLPRLCT---HARWPAPIYG 251  
 RHDV T--SAIQVTVETRPSEDFEFVMIKAPSSKTVDISIPAGLLTTPVLTGVGNDNRWNGQIVG 261  
 Vesivirus2117 TTGTSCVTVEVTRGGTDFEHLKPPSRKMIFGADPSRLIPKKSMEFW--GNRHPGEFKG 398  
 FB-NJ-13 SNSSGCIITVETKPGPDFKFHLLKPPGSMLVHGSIPSNLIPKSSSLWI--GNRHWSIDITD 360  
 F4 SNSSGCIIVTVETKPGPDFKFHLLKPPGSLVTHGSIPSDLIPKSSSLWI--GNRYWTDITD 360  
 F9 ANSSGCIIVTVETKPGPDFKFHLLKPPGSMVTHGSIPSDLIPKSSSLWI--GNRYWSDITD 360  
 C6 SNSSGCIIVTVETKPGPDFKFHLLKPPGSMVTHGSIPSDLIPKSSSLWI--GNRFWSDITD 360  
 FCV5\_3M8L SNSSGCIIVTVETKPGPDFKFHLLKPPGSMVTHGSVPCLLIPKSSSLWI--GNRFWSDITD 232  
 : : . \*\*:\* : \*

Norwalk MGISPDNVQ--SVQFQNGRCTLDRGLVGTTPVSLSHVAKIR-----GTSNGTVINL 301  
 MNV LLVDPSPS--NPQWQNGRVVDGTLGTTPISGSWVSCFAAEAAEFQSGIGEVATFSL 309  
 RHDV LQVPVGGFSTCNRHWNLNGSTYGWSSPRFGDIDHR-----RGSASYSGSNA--TNVLQFWY 315  
 Vesivirus2117 FSIKPLVF-QANRHFDCKRQTFGWSTPEHAGVKLN-----IQRQLDTEDEK--TD-IGVH- 449  
 FB-NJ-13 FVIRPSVF-QANRHFDKQETAGWSTPRFRPMTIT-----ISQKQSA-----K-LGI-- 405  
 F4 FVIRPFVF-QANRHFDNQEETAGWSTPRFRPITIT-----ISEKNGS-----K-LGI-- 405  
 F9 FVIRPFVF-QANRHFDNQEETAGWSTPRFRPISVT-----ITEQNGA-----K-LGI-- 405  
 C6 FVIRPFVF-QANRHFDNQEETAGWSTPRFRPITIT-----ISVKESA-----K-LGI-- 405  
 FCV5\_3M8L FVIRPFVF-QANRHFDNQEETAGWSTPRFRPITVT-----ISQKEGE-----M-LGI-- 277  
 : \* . : : : . :

Norwalk TELDGTGTP-FHPFEGPAPIGFDDLGGCDWH---INMTQ---FG---HSSQTQYVDVT---- 347  
 MNV VEQDGSAYVPGDRAAPLGYPDFSGQLEI---XVQTE---TT---K-SGDKLVVTT---F 355  
 RHDV AN-AGSAIDNPISQVAPDGFDMFVFPNGGIPAAGWVGFAGIWNNSNGAPNVTTVQAY 374  
 Vesivirus2117 ---LVTG-LKTIKSOVDPGWPDYGRNII---LANTT-ASFG-----EVSEAMLGTVVY 496  
 FB-NJ-13 ---AVA-LESIVPGIPDGWPDTTIDSNL---IPAGD-YAIT---NQADNDITTAMEY 451  
 F4 ---GVA-TDYIIPGIPDGWPDTTIADKL---IPAGD-YSIT---TGEENDIKTAQAY 451  
 F9 ---GVA-TDYIVPGIPDGWPDTTIPGEL---IPAGD-YAIT---NGTGNNDITTATGY 451  
 C6 ---GVA-TDYIVPGIPDGWPDTTIPGEL---VPVGD-YAIT---NGTNNNDITTAAQY 451  
 FCV5\_3M8L ---GVA-TDYIVPGIPDGWPDTTIPNEL---IPAGD-YAIT---NQSGNDIQTKEYE 323  
 \* \* : \*\* :

Norwalk -----TPDTFVPHLGSIQA---NGIGSGNYV---GVLSWI---SPPSHPSGSQVD 388  
 MNV EMV--LGPTTNDQTPYXGKVYA---SVTAASSLD---LVDGRV--RAVPRSVYGFQ-- 402  
 RHDV ELGFATGAPGNLQPTT-----NTSGAQTVAKSIY---AVVTGTA-----QN 412  
 Vesivirus2117 RVSGK---LEWRHLP---EIAFASGTAKNSTIVCGKHLTG---NFYVGG---NFTQ 540  
 FB-NJ-13 DAATEIKNNTNFRSMYICGALQRAWGDKKVSNTAFITADLDG---NTIKPN---NVIN 504  
 F4 DTAADVKNNTNFRSMYICGSLQRAWGDKKISNTAFITTAIRDG---NEIKPS---NTID 504  
 F9 DTADIIKNNTNFRSMYICGSLQRAWGDKKISNTAFITATLDGDNKINPC---NTID 507  
 C6 DAATEIRNNTNFRSMYICGSLQRAWGDKKISNTAFITTTGTVDG---AKLIPS---NTID 504  
 FCV5\_3M8L ESAMIISNNTNFRSMYICGSLQRAWGNKKVSNTAFITATVKE---NKLIPS---NTID 376  
 .

Norwalk LWKIPNYGS-----S-----ITEATHLAPSVPYPPGFGEV 417  
 MNV -DALPEYND-----G-----LL--FPLAPPIGPFLPGEI 428  
 RHDV PAGLFVMAS-----GIISTPNASAITYPQDRIVTTPGTPAAAPVG-KNT 457  
 Vesivirus2117 QGNVVVYPAFW-----TSKHGDTKCIGEDEDMVKRIDVLPQAQTG-GNY 584  
 FB-NJ-13 QSRRIIVYQDNHVNLOVQTSSEVTLAMLGYTGIGEEVIGANRDRVVRINVLPEVSARG-GNH 563  
 F4 MTKLAVYQDTHVEQEVQTSDDTLALLGYTGIGEEAIGSNRDRVVRISVLPEAGARG-GNH 563  
 F9 QSKIVVFQDNHVGKKAQTSDDTLALLGYTGIGEEAIGSDRDRVVRISTLPEAGARG-GNH 566  
 C6 QTKIAVFQDTHANKHVQTSDDTLALLGYTGIGEEAIGADRDRVVRISVLPERGARG-GNH 563  
 FCV5\_3M8L QTKIAIFQDNHVRDVQTSDDTLALLGYTGIGEEAIGADREKVVRIIGVLPEAGARG-GNH 435  
 : \* :

Norwalk LVFFMSKM-----PGPGAYNLPCLLPQEYISHLASEQAPT-----VGEAALLH 460  
 MNV LLRFRTYMRRVDSTDTSAQALDCALPQEFVSWFANNSFTV-----QSEXLLLX 476  
 RHDV PIMFASVVRRTGDNVATAGSA-----NGTQYGTGSQPLPVTIGLSLNYYSSALMPGQFFV 512  
 Vesivirus2117 PIYYVTEFPAAALP-----APRVYNSQLLWTSRLLAQDVYD--IGPEALAV 628  
 FB-NJ-13 PIYYKNSLKLGYVIR-----SIDVFNSQLLHTSRQLALNNYL--LDPDCFVAV 608  
 F4 PIFYKNSIKLGYVIR-----SIDVFNSQLLHTSRQLSLNHYL--LPPDSFAV 608  
 F9 PIFYKNSIKLGYVIR-----SIDVFNSQLLHTSRQLSLNHYL--LPPDSFAV 611  
 C6 PIFHKNSIKLGYVIR-----SIDVFNSQLLHTSRQLSLNHYL--LSPDSFAV 608  
 FCV5\_3M8L PIFYRNSMKLGYVIK-----SIDVFNSQLLHTSRQLSLNNYL--LSPDSFAV 480  
 : . . . : :

|               |                                                                                                         |     |
|---------------|---------------------------------------------------------------------------------------------------------|-----|
| Norwalk       | YVDPDTGRNLGEFKAYPDGFLTCVPNGA-SSGPQQLPINGVVFVSWVSRFYQLKPVGTA                                             | 519 |
| MNV           | YRNTLTGQLLFECKLYSEGYIALSYS---GSGPLTFPXDGFFXVVSWPRLYQLTSVGS                                              | 533 |
| RHDV          | WQLTF-ASGFMEIGLSVDGYFYAGTGASTTLIDLTELIDVRPVGPPSKSTLVFN-LGGT                                             | 570 |
| Vesivirus2117 | FKIKDSAGNWFDIGISCEGFSFVGASTLP-FSSLQFPLEASYVGMASAHNKLQHN-IAGT                                            | 686 |
| FB-NJ-13      | YRITDSNGSWFDIGIDYSGFSFVGVS---IGALEFPLTASYTGIQLAKIRLASN-IRSS                                             | 664 |
| F4            | YRIIDSNGSWFDIGIDSEGFSAFVGVS---IGKLEFPLSASYMGIQLAKIRLASN-IRSR                                            | 664 |
| F9            | YRIIDSNGSWFDIGIDSDGFSFVGVS---FGKLEFPLSASYMGIQLAKIRLASN-IRSP                                             | 667 |
| C6            | YRIIDSNGSWFDIGIDNDGFSFVGVS---IGKLEFPLTASYMGIQLAKIRLASN-IRSV                                             | 664 |
| FCV5_3M8L     | YRIIDSNGSWFDIGIDSDGFSFVGVS---IGKLEFPLTASYMGNQLAKIRLASN-IR--                                             | 534 |
|               | :                   :                   .*:                   .                   .                   : |     |
| Norwalk       | SSARGRLGLRR                                                                                             | 530 |
| MNV           | XTGRSLKS---                                                                                             | 541 |
| RHDV          | ANGFSYV----                                                                                             | 577 |
| Vesivirus2117 | SVTL-----                                                                                               | 690 |
| FB-NJ-13      | MTKL-----                                                                                               | 668 |
| F4            | MTKL-----                                                                                               | 668 |
| F9            | MTKL-----                                                                                               | 671 |
| C6            | MTKL-----                                                                                               | 668 |
| FCV5_3M8L     | -----                                                                                                   | 534 |

### SD 3

Protein sequence alignment for VP1 proteins of Norwalk virus, Murine norovirus, Rabbit haemorrhagic disease virus, Vesivirus 2117 and several strains of FCV. Highlighted in yellow are the aromatic amino-acid residues that are arranged about the icosahedral three-fold symmetry axes of these viruses.

## Supplemental Data 4

**Table S4a**

| VP2 Chain I<br>Conformer 2 | % accessible<br>area buried |  | VP1 Chain D | % accessible<br>area buried |
|----------------------------|-----------------------------|--|-------------|-----------------------------|
| LEU 70                     | 10                          |  | ARG 365     | 50                          |
| ARG 72                     | 10                          |  | VAL 457     | 10                          |
| ALA 73                     | 40                          |  | GLN 539     | 40                          |
| ALA 74                     | 90                          |  | ALA 540     | 50                          |
| GLY 75                     | 60                          |  | SER 543     | 80                          |
| PHE 76                     | 20                          |  | ASP 544     | 40                          |
|                            |                             |  | ARG 545     | 10                          |
|                            |                             |  | PHE 584     | 10                          |

**Table S4b**

| VP2 Chain J<br>Conformer 1 | % accessible<br>area buried |  | VP1 Chain A       | % accessible<br>area buried |
|----------------------------|-----------------------------|--|-------------------|-----------------------------|
| ARG 97 (THR 410)           | 50                          |  | PHE 375           | 70                          |
| TYR 100                    | 80                          |  | ASN 378 (ASN 106) | 10                          |
| ARG 101 (TYR 412)          | 80                          |  | GLN 379           | 60                          |
| LEU 103                    | 30                          |  | GLU 380 (ASN 106) | 30                          |
| PHE 104                    | 100                         |  | THR 386           | 100                         |
| LYS 105                    | 10                          |  | PRO 387           | 70                          |
| ASN 106 (GLU 380, ASN 378) | 50                          |  | ARG 388           | 40                          |
|                            |                             |  | ARG 390           | 10                          |
|                            |                             |  | THR 393           | 10                          |
|                            |                             |  | THR 410 (ARG 97)  | 50                          |
|                            |                             |  | ASP 411           | 70                          |
|                            |                             |  | TYR 412 (ARG 101) | 50                          |
|                            |                             |  | ILE 413           | 70                          |
|                            |                             |  | ASP 419           | 20                          |
|                            |                             |  | SER 596           | 100                         |
|                            |                             |  | LEU 597           | 40                          |

**Table S4c**

| VP2 Chain J<br>Conformer 1 | % accessible<br>area buried |  | VP1 Chain B | % accessible<br>area buried |
|----------------------------|-----------------------------|--|-------------|-----------------------------|
| THR 84                     | 20                          |  | SER 346     | 30                          |
| ASP 85                     | 20                          |  | SER 347     | 20                          |
| GLN 86                     | 70                          |  | SER 348     | 100                         |
| ASN 87                     | 40                          |  | LEU 349     | 30                          |
| TYR 89                     | 30                          |  | ASP 358     | 40                          |
| GLN 92                     | 70                          |  | ILE 359     | 90                          |
| ALA 95                     | 60                          |  | THR 360     | 70                          |
| ILE 96                     | 80                          |  | ASP 361     | 10                          |
| SER 99                     | 60                          |  | LYS 569     | 10                          |
| TYR 100                    | 30                          |  | SER 571     | 50                          |
| LEU 103                    | 40                          |  | SER 580     | 10                          |
|                            |                             |  | ASN 616     | 20                          |
|                            |                             |  | LYS 639     | 30                          |
|                            |                             |  | LEU 640     | 40                          |
|                            |                             |  | GLU 641     | 80                          |
|                            |                             |  | PHE 642     | 100                         |
|                            |                             |  | PRO 643     | 60                          |

**Table S4d**

| VP2 Chain J<br>Conformer 1   | % accessible<br>area buried | VP1 Chain D      | % accessible<br>area buried |
|------------------------------|-----------------------------|------------------|-----------------------------|
| LYS 55                       | 20                          | THR 360 (ARG 77) | 40                          |
| GLN 59 (ASP 456)             | 50                          | ASP 361          | 100                         |
| GLN 62                       | 50                          | PHE 362          | 20                          |
| ILE 65                       | 40                          | VAL 363          | 100                         |
| GLN 66                       | 40                          | ILE 364          | 100                         |
| VAL 68                       | 30                          | ARG 365 (TYR 81) | 60                          |
| ARG 69 (ASP 453,<br>ALA 455) | 100                         | PRO 366          | 100                         |
| LEU 70                       | 10                          | PHE 367          | 100                         |
| ARG 72 (ASP 582)             | 60                          | LYS 441          | 10                          |
| ALA 73                       | 70                          | TYR 452          | 40                          |
| PHE 76                       | 10                          | ASP 453 (ARG 69) | 70                          |
| ARG 77 (LEU 640,<br>THR 360) | 60                          | ALA 455 (ARG 69) | 90                          |
| VAL 78                       | 30                          | ASP 456 (GLN 59) | 70                          |
| ASP 79                       | 80                          | VAL 457          | 60                          |
| TYR 81 (ARG 365)             | 70                          | ILE 458          | 50                          |
| SER 82                       | 60                          | GLN 539          | 80                          |
| TYR 83                       | 50                          | ALA 540          | 50                          |
| THR 84                       | 90                          | SER 543          | 10                          |
| ASP 85                       | 10                          | ARG 545          | 30                          |
| GLN 86                       | 20                          | VAL 553          | 10                          |
| ASP 91                       | 60                          | GLU 556          | 60                          |
| ASN 94                       | 60                          | THR 557          | 50                          |
| ALA 95                       | 40                          | GLY 558          | 40                          |
| LEU 98                       | 80                          | ALA 559          | 10                          |
| ASN 102                      | 20                          | HIS 564          | 50                          |
| LYS 105                      | 10                          | LYS 569          | 70                          |
|                              |                             | ARG 579          | 30                          |
|                              |                             | SER 580          | 20                          |
|                              |                             | ILE 581          | 70                          |
|                              |                             | ASP 582          | 90                          |
|                              |                             | PHE 584          | 100                         |
|                              |                             | GLU 627          | 10                          |
|                              |                             | VAL 634          | 20                          |
|                              |                             | SER 635          | 30                          |
|                              |                             | SER 636          | 10                          |
|                              |                             | ILE 637          | 10                          |
|                              |                             | GLY 638          | 10                          |
|                              |                             | LYS 639          | 50                          |
|                              |                             | LEU 640 (ARG 77) | 50                          |
|                              |                             | PHE 642          | 20                          |

**Table S4e**

| VP2 Chain K<br>Conformer 2 | % accessible<br>area buried |  | VP1 Chain B | % accessible<br>area buried |
|----------------------------|-----------------------------|--|-------------|-----------------------------|
| LEU 70                     | 10                          |  | ARG 365     | 40                          |
| ARG 72                     | 10                          |  | VAL 457     | 20                          |
| ALA 73                     | 40                          |  | GLN 539     | 50                          |
| ALA 74                     | 90                          |  | ALA 540     | 40                          |
| GLY 75                     | 60                          |  | SER 543     | 50                          |
| PHE 76                     | 20                          |  | ASP 544     | 40                          |
|                            |                             |  | ARG 545     | 10                          |
|                            |                             |  | PHE 584     | 10                          |

**Table S4f**

| VP2 Chain L<br>Conformer 1   | % accessible<br>area buried |  | VP1 Chain C          | % accessible<br>area buried |
|------------------------------|-----------------------------|--|----------------------|-----------------------------|
| ARG 97 (THR 410,<br>ASP 411) | 60                          |  | PHE 375              | 60                          |
| TYR 100                      | 80                          |  | ASN 378              | 10                          |
| ARG 101                      | 60                          |  | GLN 379              | 40                          |
| LEU 103                      | 30                          |  | GLU 380 (ASN<br>106) | 30                          |
| PHE 104                      | 100                         |  | THR 386              | 100                         |
| ASN 106 (GLU 380)            | 50                          |  | PRO 387              | 70                          |
|                              |                             |  | ARG 388              | 50                          |
|                              |                             |  | ARG 390              | 10                          |
|                              |                             |  | THR 393              | 10                          |
|                              |                             |  | THR 410 (ARG 97)     | 40                          |
|                              |                             |  | ASP 411 (ARG 97)     | 60                          |
|                              |                             |  | TYR 412              | 50                          |
|                              |                             |  | ILE 413              | 70                          |
|                              |                             |  | ASP 419              | 10                          |
|                              |                             |  | ARG 593              | 10                          |
|                              |                             |  | SER 596              | 100                         |
|                              |                             |  | LEU 597              | 30                          |



**Table S4g**

| VP2 Chain L<br>Conformer 1 | % accessible<br>area buried |  | VP1 Chain D      | % accessible<br>area buried |
|----------------------------|-----------------------------|--|------------------|-----------------------------|
| THR 84                     | 20                          |  | SER 346          | 40                          |
| ASP 85                     | 30                          |  | SER 347          | 30                          |
| GLN 86                     | 100                         |  | SER 348          | 100                         |
| ASN 87 (LYS 639)           | 40                          |  | LEU 349          | 30                          |
| TYR 89                     | 40                          |  | ASP 358          | 30                          |
| GLN 92                     | 70                          |  | ILE 359          | 70                          |
| ALA 95                     | 50                          |  | THR 360          | 90                          |
| ILE 96                     | 70                          |  | LYS 569          | 20                          |
| SER 99                     | 50                          |  | SER 571          | 50                          |
| TYR 100                    | 30                          |  | ASN 616          | 20                          |
| LEU 103                    | 40                          |  | LYS 639 (ASN 87) | 40                          |
| PHE 104                    | 10                          |  | LEU 640          | 30                          |
|                            |                             |  | GLU 641          | 70                          |
|                            |                             |  | PHE 642          | 100                         |
|                            |                             |  | PRO 643          | 60                          |

**Table S4h**

| VP2 Chain L<br>Conformer 1   | % accessible<br>area buried | VP1 Chain B      | % accessible<br>area buried |
|------------------------------|-----------------------------|------------------|-----------------------------|
| LYS 55                       | 20                          | THR 360          | 40                          |
| GLN 59                       | 30                          | ASP 361          | 100                         |
| GLN 62                       | 60                          | PHE 362          | 50                          |
| ILE 65                       | 20                          | VAL 363          | 100                         |
| GLN 66                       | 30                          | ILE 364          | 100                         |
| VAL 68                       | 40                          | ARG 365          | 70                          |
| ARG 69 (TYR 452,<br>ALA 455) | 100                         | PRO 366          | 90                          |
| LEU 70                       | 10                          | PHE 367          | 100                         |
| ARG 72 (ASP 582)             | 60                          | LYS 441          | 30                          |
| ALA 73                       | 60                          | TYR 452 (ARG 69) | 30                          |
| PHE 76                       | 10                          | ASP 453          | 80                          |
| ARG 77 (LYS 639)             | 60                          | ALA 455 (ARG 69) | 70                          |
| VAL 78                       | 30                          | ASP 456          | 70                          |
| ASP 79                       | 80                          | VAL 457          | 70                          |
| PRO 80                       | 10                          | ILE 458          | 80                          |
| TYR 81 (ASP 582)             | 80                          | GLY 537          | 10                          |
| SER 82                       | 70                          | GLN 539          | 60                          |
| TYR 83                       | 50                          | ILE 541          | 20                          |
| THR 84                       | 90                          | ARG 545          | 40                          |
| ASP 85                       | 10                          | LEU 554          | 10                          |
| GLN 86                       | 20                          | GLU 556          | 100                         |
| ASP 90                       | 10                          | THR 557          | 40                          |
| ASP 91                       | 60                          | GLY 558          | 30                          |
| ASN 94                       | 80                          | HIS 564          | 50                          |
| ALA 95                       | 40                          | LYS 569          | 50                          |
| LEU 98                       | 80                          | ARG 579          | 20                          |
| ARG 101                      | 10                          | SER 580          | 20                          |
| ASN 102                      | 10                          | ILE 581          | 40                          |
|                              |                             | ASP 582 (ARG 72) | 90                          |
|                              |                             | PHE 584          | 80                          |
|                              |                             | GLU 627          | 10                          |
|                              |                             | SER 635          | 30                          |
|                              |                             | SER 636          | 20                          |
|                              |                             | ILE 637          | 30                          |
|                              |                             | GLY 638          | 30                          |
|                              |                             | LYS 639 (ARG 77) | 50                          |
|                              |                             | LEU 640          | 70                          |
|                              |                             | PHE 642          | 20                          |

**SD 4**

Tables to show the amino-acid residues that contribute to the interfaces between FCV VP1 and the portal protein VP2. The tables list amino acids contributing to contact interfaces in each column, rows do not indicate direct interactions between specific amino-acid residues.

Residues coloured blue are predicted to form a hydrogen bond with the residue in brackets, residues coloured red are predicted to form a salt-bridge.

**Supplemental Data 5**

|                                     | <b>pH3</b>   | <b>pH4</b>   | <b>pH5</b>      | <b>pH6</b>       | <b>pH7</b>      | <b>pH8</b>      | <b>pH9</b>      |
|-------------------------------------|--------------|--------------|-----------------|------------------|-----------------|-----------------|-----------------|
| <b>Central tendency</b>             | 178935       | 76897        | 51651           | 48826            | 82787           | 43448           | 31503           |
| <b>Variation (SD)</b>               | 51311        | 31468        | 7331            | 11953            | 10387           | 7272            | 7147            |
| <b>F</b>                            | 369.6        | 389.7        | 42.35           | -95.83           | -19.77          | -39.32          | -75.39          |
| <b>Confidence Intervals</b>         | 178 to 561.2 | 346 to 433.4 | -4.138 to 88.84 | -182.7 to -8.942 | -107.2 to 67.65 | -88.36 to 9.707 | -117.9 to -32.9 |
| <b>Effect sizes (R<sup>2</sup>)</b> | 0.1324       | 0.6819       | 0.03294         | 0.03173          | 0.001376        | 0.01703         | 0.07818         |
| <b>Degrees of Freedom</b>           | 1, 145       | 1, 145       | 1, 145          | 1, 145           | 1, 145          | 1, 145          | 1, 145          |
| <b>P value</b>                      | 0.0002       | <0.0001      | 0.0737          | 0.0309           | 0.6556          | 0.1151          | 0.0006          |

**SD 5** Statistical analysis of RNA release assay data for FCV in the presence of fJAM-A and at varying pH values. Linear regression was used to evaluate whether the slope for each plot of fluorescence against time under different pH conditions was non-zero.

## Supplemental Data 6

| fJAM-A:VP1 ratio               | Dye only         | 1:1           | 1:2            | 1:5             | 1:7            | 1:9             |
|--------------------------------|------------------|---------------|----------------|-----------------|----------------|-----------------|
| Central tendency               | 9768             | 22308         | 26204          | 23988           | 12096          | 16671           |
| Variation (SD)                 | 3659             | 7353          | 5921           | 6791            | 4872           | 4158            |
| F                              | -44.8            | 85.83         | 67.99          | 64.48           | 52.39          | 45.13           |
| Confidence Intervals           | -49.25 to -39.71 | 72.4 to 99.25 | 48.23 to 87.75 | 42.21 to 86.75  | 35.48 to 69.31 | 31.87 to 58.38  |
| Effect sizes (R <sup>2</sup> ) | 0.7008           | 0.5241        | 0.2417         | 0.1843          | 0.2053         | 0.2379          |
| Degrees of Freedom             | 1, 145           | 1, 145        | 1, 145         | 1, 145          | 1, 145         | 1, 145          |
| P value                        | <0.0001          | <0.0001       | <0.0001        | <0.0001         | <0.0001        | <0.0001         |
|                                |                  |               |                |                 |                |                 |
|                                | <b>1:11</b>      | <b>1:14</b>   | <b>1:16</b>    | <b>1:18</b>     | <b>1:20</b>    | <b>1:22</b>     |
| Central tendency               | 15158            | 16406         | 4355           | 3702            | 9267           | 12301           |
| Variation (SD)                 | 3732             | 4883          | 1857           | 1863            | 4485           | 1132            |
| F                              | 0.583            | 47.03         | -3.222         | 5.4             | 17.12          | 8.194           |
| Confidence Intervals           | -20.65 to 21.81  | 33.8 to 60.26 | -12.06 to 5.62 | -8.314 to 19.11 | 4.075 to 30.17 | -12.73 to 29.12 |
| Effect sizes (R <sup>2</sup> ) | 0.000002         | 0.2539        | 0.003564       | 0.004159        | 0.06602        | 0.007533        |
| Degrees of Freedom             | 1, 145           | 1, 145        | 1, 145         | 1, 145          | 1, 145         | 1, 145          |
| P value                        | 0.9568           | <0.0001       | 0.4726         | 0.4377          | 0.0106         | 0.4381          |

### SD 6

Statistical analysis of RNA release assay data showing the RNA released by virions at low pH and in the presence of varying ratios of fJAM-A to VP1. Linear regression was used to evaluate whether the slope for each plot of fluorescence against time was non-zero.

## Supplemental Data 7

**Table S7a**

| PDB 1NBQ<br>Human JAM-A<br>Chain A | % accessible<br>area buried |  | PDB 1NBQ<br>Human JAM-A<br>Chain B | % accessible<br>area buried |
|------------------------------------|-----------------------------|--|------------------------------------|-----------------------------|
| MET 26                             | 30                          |  | MET 26                             | 30                          |
| ARG 59 (GLU 61,<br>ASN 76)         | 90                          |  | ARG 59 (GLU 61,<br>ASN 76)         | 90                          |
| GLU 61 (ARG 59)                    | 80                          |  | GLU 61 (ARG 59)                    | 80                          |
| LYS 63 (GLU 121)                   | 70                          |  | LYS 63 (GLU 121)                   | 70                          |
| ASP 68                             | 10                          |  | ASP 68                             | 10                          |
| THR 69                             | 20                          |  | THR 69                             | 20                          |
| THR 70                             | 70                          |  | THR 70                             | 70                          |
| ARG 71                             | 40                          |  | ARG 71                             | 40                          |
| LEU 72                             | 100                         |  | LEU 72                             | 100                         |
| TYR 75 (GLU 114)                   | 100                         |  | TYR 75 (GLU 114)                   | 100                         |
| ASN 76 (ARG 59)                    | 10                          |  | ASN 76 (ARG 59)                    | 10                          |
| THR 80                             | 90                          |  | THR 80                             | 90                          |
| ALA 81                             | 30                          |  | ALA 81                             | 30                          |
| SER 82                             | 10                          |  | SER 82                             | 10                          |
| MET 110                            | 60                          |  | MET 110                            | 60                          |
| SER 112                            | 100                         |  | SER 112                            | 100                         |
| GLU 113                            | 20                          |  | GLU 113                            | 20                          |
| GLU 114 (TYR 75)                   | 20                          |  | GLU 114 (TYR 75)                   | 20                          |
| GLY 115                            | 50                          |  | GLY 115                            | 50                          |
| GLY 116                            | 100                         |  | GLY 116                            | 100                         |
| ASN 117                            | 40                          |  | ASN 117                            | 40                          |
| SER 118                            | 40                          |  | SER 118                            | 40                          |
| TYR 119                            | 100                         |  | TYR 119                            | 100                         |
| GLY 120                            | 20                          |  | GLY 120                            | 20                          |
| GLU 121 (LYS 63)                   | 30                          |  | GLU 121 (LYS 63)                   | 30                          |

**Table S7b**

| fJAM-A Chain G<br>(FCV bound) | % accessible<br>area buried | fJAM-A Chain H<br>(FCV bound) | % accessible<br>area buried |
|-------------------------------|-----------------------------|-------------------------------|-----------------------------|
| ARG 58                        | 50                          | ARG 58                        | 60                          |
| LYS 62 (GLU 175)              | 50                          | GLU 60                        | 30                          |
| THR 107                       | 30                          | LYS 62 (GLU 175)              | 50                          |
| MET 109                       | 60                          | THR 107                       | 20                          |
| VAL 110                       | 50                          | MET 109 (ARG<br>180)          | 80                          |
| SER 111                       | 50                          | VAL 110                       | 50                          |
| ASN 116                       | 20                          | SER 111                       | 80                          |
| THR 117                       | 20                          | GLY 115                       | 40                          |
| TYR 118 (ARG 180)             | 70                          | ASN 116                       | 20                          |
| GLY 119                       | 70                          | THR 117                       | 30                          |
| GLU 120 (ARG 180)             | 100                         | TYR 118 (ARG 180)             | 90                          |
| VAL 121                       | 10                          | GLY 119                       | 70                          |
| SER 122                       | 10                          | GLU 120                       | 100                         |
| VAL 170                       | 60                          | VAL 121                       | 10                          |
| ARG 171                       | 80                          | SER 122                       | 10                          |
| PRO 173                       | 100                         | VAL 170                       | 50                          |
| LEU 174                       | 30                          | ARG 171                       | 70                          |
| GLU 175 (LYS 62)              | 50                          | PRO 173                       | 100                         |
| ASN 179                       | 30                          | LEU 174                       | 30                          |
| ARG 180 (MET 109,<br>TYR 118) | 100                         | GLU 175 (LYS 62)              | 60                          |
| ALA 181                       | 20                          | ASN 179                       | 20                          |
|                               |                             | ARG 180 (TYR 118,<br>GLU 120) | 80                          |

**SD 7** Tables to show the amino-acid residues that contribute to the interfaces between junctional adhesion molecule A. Human JAM-A forms homodimers via an interface in D1 (a). fJAM-A forms similarly shaped homodimers in solution, but when bound to FCV a second interaction disrupts the D1-D1 interface, leading to a new set of contacts between D1 and D2 of symmetry related molecules (b). The tables list amino acids contributing to contact interfaces in each column, rows do not indicate direct interactions between specific amino-acid residues. Residues coloured blue are predicted to form a hydrogen bond with the residue in brackets, residues coloured red are predicted to form a salt-bridge.
